# Supplementary material for: Not Only Mutations Matter: Molecular Picture of Acute Myeloid Leukemia Emerging from Transcriptome Studies
Source: J Oncol. 2019 Jul 30;2019:7239206. doi: 10.1155/2019/7239206 (PMC6699387; doi:10.1155/2019/7239206)
Supplement: Supplementary Materials — Supplementary Table 1 presents the results of PubMed search demonstrating a great effort of the scientific community put into acute myeloid leukemia research. All terms used for searching are included, along with the corresponding numbers of papers found, with two additional filters applied. Part of the information presented in Supplementary Table 1 was used to generate Figure 1 plots. Supplementary Table 2 lists all AML transcriptome papers cited in the manuscript. The following information is included: title, first, and last author, laboratory, name of the journal, year of publication, AML sample size, sample description, and technology applied. All papers are divided according to the technology (microarray/PCR or NGS) and then ordered chronologically. [file 7239206.f1.zip]

Archive with 2 entries (2 files):
- mat.7239206.v1 (1).docx
- Supplementary Table 2.xlsx
