# Supplementary material for: Not Only Mutations Matter: Molecular Picture of Acute Myeloid Leukemia Emerging from Transcriptome Studies
Source: J Oncol. 2019 Jul 30;2019:7239206. doi: 10.1155/2019/7239206 (PMC6699387; doi:10.1155/2019/7239206)
Supplement: Supplementary Materials — Supplementary Table 1 presents the results of PubMed search demonstrating a great effort of the scientific community put into acute myeloid leukemia research. All terms used for searching are included, along with the corresponding numbers of papers found, with two additional filters applied. Part of the information presented in Supplementary Table 1 was used to generate Figure 1 plots. Supplementary Table 2 lists all AML transcriptome papers cited in the manuscript. The following information is included: title, first, and last author, laboratory, name of the journal, year of publication, AML sample size, sample description, and technology applied. All papers are divided according to the technology (microarray/PCR or NGS) and then ordered chronologically. [file 7239206.f1.zip › Supplementary Table 2.xlsx]

## Sheet: Arkusz1
Supplementary Table 2. The list of AML transcriptome papers cited in the review.
Publication title	Sample summary	AML sample size (number of patients)	Technology	First author	Year	Journal	Last author	Laboratory	The object of the study
MICROARRAY and PCR-BASED PAPERS
Molecular Classifcation of Cancer: Class Discovery and Class Prediction by Gene Expression Monitoring	38 bone marrow samples (27 ALL, 11 AML)	11	Affymetrix GeneChips	Todd R. Golub	1999	Nature	Eric S. Lander	Whitehead Institute / Massachusetts Institute of Technology, Center for Genome Research, Cambridge, USA	protein coding genes
Identification of myelodysplastic syndrome–specific genes by DNA microarray analysis with purified hematopoietic stem cell fraction	166 Blast Bank samples: 8 healthy volunteers, 32 AMLs, 10 ALLs, 42 cases of MDS (including MDS-associated leukemia), 25 CMLs, 13 aplastic anemias, and 36 cases of other diseases	32	cDNA microarray (IntelliGene Human Cancer CHIP; Takara) and custom-made oligonucleotide microarrays (Mergen)	Akira Miyazato	2001	Blood	Hiroyuki Mano	Jichi Medical School, Division of Functional Genomics, Tochigi, Japan	protein coding genes
Expression profiling reveals fundamental biological differences in acute myeloid leukemia with isolated trisomy 8 and normal cytogenetics	10 AML +8, 10 CN-AML and 7 normal BM CD34+ cells fraction	10	Affymetrix GeneChips	Kimmo Virtaneva	2001	PNAS	Ralf Krahe	Ohio State University, Comprehensive Cancer Center, USA	protein coding genes
MLL translocations specify a distinct gene expression profile that distinguishes a unique leukemia	1st experiment: 37 B-ALL samples (20 without and 17 with MLL translcoations); 2nd experiment: training set - 20 ALL, 17 MLL and 20 AML samples; test set - 3 conventional childhood ALL, 2 childhood ALL with MLL translocations, 2 childhood ALL without MLL translocations, 3 AML samples	23	Affymetrix GeneChips	Scott A. Armstrong	2002	Nature Genetics	Todd R. Golub & Stanley J. Korsmeyer	Harvard Medical School, Boston Massachusetts, USA	protein coding genes
Acute myeloid leukemias with reciprocal rearrangements can be distinguished by specific gene expression profiles	37 BM from de novo AML: 9 M2 with t(8;21); 10 M3, 8 M3v, 10 M4eo with inv(16)	37	Affymetrix GeneChips	Claudia Schoch	2002	PNAS	Torsten Haferlach	Ludwig-Maximilians University, Laboratory for Leukemia Diagnostics, Munich, Germany	protein coding genes
Identification of a gene expression signature associated with pediatric AML prognosis	54 pediatric AML patients (younger than 15 years): 1 with M0, 12 with M2, 12 with M4, 19 with M5, 8 with M7 FAB subtype, and 2 unclassified with mixed lineage (M3 excluded)	54	Affymetrix GeneChips	Tomohito Yagi	2003	Blood	Hitoshi Ichikawa	National Cancer Center Research Institute, Tokyo, Japan	protein coding genes
Genome-wide Analysis of Acute Myeloid Leukemia With Normal Karyotype Reveals a Unique Pattern of Homeobox Gene Expression Distinct From Those With Translocation-Mediated Fusion Events	5 with t(8;21), 4 with t(15;17), 5 with inc(16), 1 dir ins(6;11), 1 t(6;11), 2 t(9;11), 10 NK-AML	28	Affymetrix GeneChips	Silvana Debernardi	2003	Genes Chromosomes Cancer	Bryan D. Young	Barts and the Royal London School of Medicine and Dentistry, Medical Oncology Unit, Cancer Research United Kingdom, London	protein coding genes
DNA microarray analysis of dysplastic morphology associated with acute myeloid leukemia	AML without dysplasia (15), AML-MDL (11), MDS-realted AML (11), TRL (2)	39	Affymetrix GeneChips	Chizuko Tsustumi	2004	Exp Hematol	Hiroyuki Mano	Jichi Medical School, Division of Functional Genomics, Tochigi, Japan	protein coding genes
Gene expression profiling of pediatric acute myelogenous leukemia	120 pediatric AML, 20 adult AML BM and PB samples	150	Affymetrix GeneChips	Mary E. Ross	2004	Blood	James R. Downing	St Jude Children’s Research Hospital, Departments of Hematology-Oncology and Pathology, Memphis, USA	protein coding genes
Microarray and serial analysis of gene expression analyses identify known and novel transcripts overexpressed in hematopietic stem cells	hematopoietic stem-progenitor cells isolated by FACS sorting from normal bone marrow (BM), peripheral blood (PB) and placental/umbilical cord blood (CB) (duplicated pools from different donors)	0	Affymetrix GeneChips, SAGE	Robert W. Georgantas	2004	Cancer Research	Curt I. Civin	Johns Hopkins University School of Medicine, Department of Oncology and Sidney Kimmel Comprehensive Cancer Center, Baltimore, USA	protein coding genes
Use of Gene-Expression Profiling to Identify Prognostic Subclasses in Adult Acute Myeloid Leukemia	65 PB and 54 BM from 116 patients	116	cDNA arrays	Lars Bullinger	2004	NEJM	Jonathan R. Pollack	Department of Pathology, Stanford University, USA	protein coding genes
Prognostically Useful Gene-Expression Profiles in Acute Myeloid Leukemia	285 AML and 8 healthy controls	285	Affymetrix GeneChips	Peter J.M. Valk	2004	NEJM	Ruud Delwel	Erasmus University Medical Center, Department of Hematology, Rotterdam, the Netherlands	protein coding genes
Molecular signatures in childhood acute leukemia and their correlations to expression patterns in normal hematopoietic subpopulations	121 leukemias: 87 B-cell ALL, 11 T-cell ALL, 23 AML and 6 normal BM and 10 different normal heatopoietic cell populations	23	cDNA arrays (Lund University)	Anna Andersson	2005	PNAS	Thoas Fioretos	Lund University, Departments of Hematology and Pediatrics, Sweden	protein coding genes
Global approach to the diagnosis of leukemia using gene expression profiling	892 (620 AML, 152 ALL, 75 CML, 45 CLL, 45 nonleukemia - control)	620	Affymetrix GeneChips	Torsten Haferlach	2005	Blood	Claudia Schoch	Ludwig-Maximilians University, Laboratory for Leukemia Diagnostics, Munich, Germany	protein coding genes
M3 and AML M3 variant each have a distinct gene expression signature but also share patterns different from other genetically defined AML subtypes	35 APL patients (19 AML M3, 16 AML M3v) comapred with t(8;21) (n = 35), inv(16) (n = 35), or t(11q23)/MLL (n = 35) or AML with normal karyotype (n = 50)	190	Affymetrix GeneChips	Torsten Haferlach	2005	Genes, Chromosomes & Cancer	Claudia Schoch	Laboratory for Leukemia Diagnostics, University Hospital Grosshadern, Ludwig-Maximilians-University, Munich, Germany.	protein coding genes
New insights into MLL gene rearranged acute leukemias using gene expression profiling: shared pathways, lineage commitment, and partner genes	73 t(11q23)/MLL leukemias (25 ALL and 48 AML) in comparison to 290 other acute leukemias	252	Affymetrix GeneChips	Alexander Kohlmann	2005	Leukemia	Torsten Haferlach	Ludwig-Maximilians University, Laboratory for Leukemia Diagnostics, Munich, Germany	protein coding genes
Genomic gains and losses influence expression levels of genes located within the affected regions: a study on acute myeloid leukemias with trisomy 8, 11, or 13, monosomy 7, or deletion 5q	12 cases with trisomy 8 (AML-TRI8), 7 with trisomy 11 (AML-TRI11), 7 with trisomy 13 (AML-TRI13), 9 cases with monosomy 7 (AML-MO7), and 7 cases with a deletion of the long arm of chromosome 5 (5q) (AML-DEL5q), as well as 104 AML with normal karyotype (AML-NK).	146	Affymetrix GeneChips	Claudia Schoch	2005	Leukemia	Torsten Haferlach	Laboratory for Leukemia Diagnostics, Department of Internal Medicine III, University Hospital Grosshadern, Ludwig-Maximilians-University, Munich, Germany	protein coding genes
Gene-expression profiles and their association with drug resistance in adult acute myeloid leukemia	137 (training set: 33 (22 patients with good response and 11 patients with poor response), test test: 104)	137	cDNA arrays (Stanford University)	Michael Heuser	2005	Haematologica	Arnold Ganser	Hannover Medical School, Hemostaseology and Oncology, Germany	protein coding genes
Gene expression profile reveals deregulation of genes with relevant functions in the different subclasses of acute myeloid leukemia	10 APL with t(15;17), 4 AML with inv(16), 7 monocytic leukemias, 22 nonmonocytic leukemias	43	Affymetrix GeneChips	N.C. Gutierrez	2005	Leukemia	J.F. San Miguel	Hospital Universitario de Salamanca, Servicio de Hematologıa, Spain	protein coding genes
Acute myeloid leukemia bearing cytoplasmic nucleophosmin (NPMc+ AML) shows a distinct gene expression profile characterized by up-regulation of genes involved in stem-cell maintenance	78 patients with de novo AMLs (other than M3; 72 with normal karyotype, 6 without major chromosomal abnormalities; age, 15-60 years), including 24 with NPM1 mutation; all patients were divided into 2 groups: training set and test set	78	Affymetrix GeneChips	Myriam Alcalay	2005	Blood	Pier Giuseppe Pelicci	Institute of Molecular Oncology (IFOM) of the Italian Foundation for Cancer Research, Milan, Italy	protein coding genes
Mutations in nucleophosmin (NPM1) in acute myeloid leukemia (AML): association with other gene abnormalities and previously established gene expression signatures and their favorable prognostic significance	275 cases of de novo AML, including 95 (35%) with NPM1 mutation	275	Affymetrix GeneChips	Roel G. W. Verhaak	2005	Blood	Peter J. M. Valk	Departments of Hematology, Statistics, and Internal Medicine, Erasmus University Medical Center, Rotterdam, The Netherlands	protein coding genes
MicroRNA expression profiles classify human cancers	334 samples	10	bead-based flow cytometric miRNA expression profiling of 217 miRNAs	Jun Lu	2005	Nature	Todd R. Golub	Broad Institute of MIT and Harvard, Cambridge, Massachusetts, USA & Department of Pediatric Oncology, Dana-Farber Cancer Institute and Harvard Medical School, Boston, Massachusetts, USA	miRNA
MicroRNAs 221 and 222 inhibit normal erythropoiesis and erythroleukemic cell growth via kit receptor down-modulation	cell cultures: unilineage E culture of CB CD34 HPCs, TF-1 and HL60	0	microRNA microarray	Nadia Felli	2005	PNAS	Cesare Peschle	Department of Hematology, Oncology, and Molecular Medicine, Istituto Superiore di Sanità, Rome, Italy	miRNA
A Minicircuitry Comprised of MicroRNA-223 and Transcription Factors NFI-A and C/EBPα Regulates Human Granulopoiesis	cell lines and 2 APL patients	2	real-time RT-PCR quantification	Francesco Fazi	2005	Cell	Irene Bozzoni	Department of Histology and Medical Embryology, University of Rome ‘‘La Sapienza’’ and San Raffaele Biomedical Science Park of Rome, Rome, Italy	miRNA
Identification of a molecular signature predictive of sensitivity to differentiation induction in acute myeloid leukemia	10 AML blast cell populations and 6 AML cell lines, predictor tested on Valk's and Bullinger's datasets	16	Affymetrix GeneChips	E. Tagliafico	2006	Leukemia	Sergio Ferrari	Università di Modena e Reggio Emilia, Italy	protein coding genes
Gene expression profiling of adult acute myeloid leukemia identifies novel biologic clusters for risk classification and outcome prediction	older AML patients (median age 65 years)	170	Affymetrix GeneChips	Carla S. Wilson	2006	Blood	Cheryl L. Willman	University of New Mexico, Department of Patology, USA	protein coding genes
Independent confirmation of a prognostic gene-expression signature in adult acute myeloid leukemia with a normal karyotype: a Cancer and Leukemia Group B study	64 NK-AML patients younger than 60 years	64	Affymetrix GeneChips	Michael D. Radmacher	2006	Blood	Clara D. Bloomfield	Ohio State University, Comprehensive Cancer Center, USA	protein coding genes
Significance of murine retroviral mutagenesis for identification of disease genes in human acute myeloid leukemia	AML patients from previous studies - datasets published by Valk (2004) and Ross et al. (2004)	285 adult and 130 pediatric	Affymetrix GeneChips	Stefan J. Erkeland	2006	Cancer Research	Iwo P. Touw	Erasmus University Medical Center, Department of Hematology, Rotterdam, the Netherlands	protein coding genes
Gene expression profiles in acute myeloid leukemia with common translocations using SAGE	22 AML cases with four the most common transolcations: de novo AML with t(8;21), t(15;17), inv(16 and t(9;11) (5 cases each), and with theray-related t(9;11) AML (3 cases)	22	SAGE	Sanggyu Lee	2006	PNAS	Janet D. Rowley	University of Chicago, Departments of Medicine and Health Studies, USA	protein coding genes
Comparison of gene-expression profiles in parallel bone marrow and peripheral blood samples in acute myeloid leukaemia by real-time polymerase chain reaction	Parallel BM aspirate and PB samples, both collected from each patient at the same time, obtained from 19 patients with AML, after treatment	19	real-time RT-PCR	E. Sakhinia	2006	Journal of Clinical Pathology	R. J. Byers	Faculty of Medical and Human Sciences, Division of Laboratory and Regenerative Medicine, School of Medicine, The University of Manchester, Manchester, UK	mRNA
Distinct gene expression profiles of acute myeloid/T-lymphoid leukemia with silenced CEBPA and mutations in NOTCH1	2 independent cohorts of AML patients. The first cohort: 262 from 285 patients described previously by Valk et al. (2004); the second: 268 patients	530	Affymetrix GeneChips	Bas J. Wouters	2007	Blood	Ruud Delwel	Department of Hematology, Erasmus University Medical Center, Rotterdam, the Netherlands	protein coding genes, genome-wide methylation and chromatin immunoprecipitation
Gene expression profile related to prognosis of acute myeloid leukemia	HL60-cell line and 4 clinical AML samples	4	in-house microarray	Min Ha Park	2007	Oncology Reports	Jong Hoon Park	Biological Science, Sookmyung Women's University, Seoul, Korea	protein coding genes
MicroRNA expression signatures accurately discriminate acute lymphoblastic leukemia from acute myeloid leukemia	164 samples, including 154 leukemic (136 patient samples and 18 cell lines) and 10 normal bone marrow controls [two CD15 , two CD19 , one CD34 , and five MNC samples]	136	bead-based flow cytometric miRNA expression profiling of 217 miRNAs	Shuangli Mi	2007	PNAS	Jianjun Chen	Department of Medicine, University of Chicago, Chicago, IL, USA	miRNA
CD34+ hematopoietic stem-progenitor cell microRNA expression and function: A circuit diagram of differentiation control	Human CD34+ cells from normal adult donors and 10 cell lines (inlcuding AML)	0	miRNA expression microarrays	Robert W. Georgantas	2007	PNAS	Curt I. Civin	Sidney Kimmel Comprehensive Cancer Center at Johns Hopkins, The Johns Hopkins University School of Medicine, Baltimore, MD, USA	miRNA
MicroRNA miR-181a correlates with morphological sub-class of acute myeloid leukaemia and the expression of its target genes in global genome-wide analysis	30 NK-AML samples	30	Microarrays (Affymetrix) for mRNAs, quantitative real-time PCR assay for miRNAs	Silvana Debernardi	2007	Leukemia	BD Young	Medical Oncology Department, Cancer Research UK, Barts and the London School of Medicine, Queen Mary College, Charterhouse Square, London, UK	miRNA and mRNA
MicroRNA gene expression during retinoic acid-induced differentiation of human acute promyelocytic leukemia	NB4 and HL-60 cells treated with ATRA,plus cell samples from 3 AML patients	3	miRNA microarray	Ramiro Garzon	2007	Oncogene	Carlo M. Croce	Department of Molecular Virology, Immunology and Medical Genetics and Comprehensive Cancer Center, Ohio State University, Columbus, OH, USA	miRNA
An 86-probe-set gene-expression signature predicts survival in cytogenetically normal acute myeloid leukemia	3 cohorts: training (163 AML patients); test (79 European NK-AML patients); and validation cohort (64 CN-AML patients from USA)	1006	Affymetrix GeneChips	Klaus H. Metzeler	2008	Blood	Christian Buske	Laboratory of Leukemia Diagnostics, Department of Internal Medicine III, Ludwig-Maximilians-Universitat, Munich, Germany	protein coding genes
A comparison of gene expression profiles between primary human AML cells and AML cell lines	AML with t(9;11)(p22;q23) and Mono Mac 6 (MM6) cell line	2	SAGE	Jinseok Lee	2008	Genes & Genetic Systems	Sanggyu Lee	Kyungpook National Univeristy, School of Life Science and Biotechnology, Korea	protein coding genes
HOX expression patterns identify a common signature for favorable AML	115 AML cases representing different cytogenetic types and 4 CD34+ normal cells in a first set, 44 AMLs in the second set, analysis of 43 genes: clustered HOX genes (39), polycomb, MLL (present KMT2A) and FLT3	159	real-time RT-PCR	M. Andreeff	2008	Leukemia	H.A. Drabkin	Medical University of South Carolina, Division of Hematology-Oncology, Charleston, USA	protein coding genes
Acute myeloid leukemia bearing cytoplasmic nucleophosmin (NPMc+ AML) shows a distinct gene expression profile characterized by up-regulation of genes involved in stem-cell maintenance	78 de novo AML patients (15-60 years old), including 58 NPMc+ and 20 NK-AMLs, the whole set divided into training set (39) and test set (39)	78	Affymetrix GeneChips	Myriam Alcalay	2008	Blood	Pier Giuseppe Pelicci	Institute of Molecular Oncology of the Italian Foundation of for Cancer Research, Milan, Italy	protein coding genes
The CXCR4 antagonist AMD3100 impairs survival of human AML cells and induces their differentiation	HL-60, U937, ML-2, Meg-O1 and CHRF AML cell lines	0	Affymetrix GeneChips	S. Tavor	2008	Leukemia	G. Rechavi	Institute of Hematology and Bone Marrow Transplantation, Sourasky Medical Center & Cancer Research Center, Sheba Medical Center, Tel-Hashomer, and Sackler School of Medicine, Tel Aviv University, Tel Aviv, Israel	protein coding genes
Identification of genes with abnormal expression changes in acute myeloid leukemia	hematopoietic cells from 38 healthy donors and leukemic blasts from 26 AML patients; validation set: 9 healthy donors and 21 pediatric AML patients	47	Affymetrix GeneChips	Derek L. Stirewalt	2008	Genes, Chromosomes & Cancer	Jerald P. Radich	Clinical Research Division, Fred Hutchinson Cancer Research Center, Seattle, WA, USA	protein coding genes
High BAALC expression associates with other molecular prognostic markers, poor outcome, and a distinct gene-expression signature in cytogenetically normal patients younger than 60 years with acute myeloid leukemia: a Cancer and Leukemia Group B (CALGB) study	172 adult patients younger than 60 years old with untreated primary CN-AML	172	Affymetrix GeneChips for mRNA, custom microarrays for miRNA	Christian Langer	2008	Blood	Clara D. Bloomfield	Ohio State University, Comprehensive Cancer Center, USA	mRNA and miRNA
Distinctive Patterns of MicroRNA Expression Associated with Karyotype in Acute Myeloid Leukaemia	102 AL. Pateints and 2 AML cell lines	100	Quantitative real-time PCR assay (TaqMan) for 157 miRNAs	Amanda Dixon-McIver	2008	PloS ONE	Silvana Debernardi	Institute of Cancer, Medical Oncology Centre, Barts and The London, School Of Medicine, London, United Kingdom	miRNA
MicroRNA expression profiling in relation to the genetic heterogeneity of acute myeloid leukemia	215 patients, FAB M0-M6, different genetic and cytogenetic background, including 100 NK-AML patients	215	multiplex real-time quantitative RT-PCR for 260 miRNAs	Mojca Jongen-Lavrencic	2008	Blood	Bob Löwenberg	Department of Hematology, Erasmus University Medical Center, Rotterdam, The Netherlands	miRNA
Distinctive microRNA signature of acute myeloid leukemia bearing cytoplasmic mutated nucleophosmin	85 adult AML patients: 55 with NPM1 mutation, 30 without	85	miRNA microarray	Ramiro Garzon	2008	PNAS	Brunangelo Falini	Department of Medicine, Comprehensive Cancer Center, Ohio State University, Columbus, OH, USA	miRNA
MicroRNA signatures associated with cytogenetics and prognosis in acute myeloid leukemia	182 AML patients divided into two sets: 122 and 60	182	miRNA microarray	Ramiro Garzon	2008	Blood	Carlo M. Croce	Division of Hematology and Oncology, Department of Internal Medicine, Comprehensive Cancer Center, Ohio State University, Columbus, USA	miRNA
Distinct microRNA expression profiles in acute myeloid leukemia with common translocations	57 samples, including 47 primary AML specimens, 7 AML cell lines, and 3 normal control samples	47	bead-based flow cytometric miRNA expression profiling of 435 miRNAs	Zejuan Li	2008	PNAS	Jianjun Chen	Department of Medicine, University of Chicago, Chicago, IL, USA	miRNA
MicroRNA Expression in Cytogenetically Normal Acute Myeloid Leukemia	training group of 64 patients and validation group of 55 patients	119	microRNA microarray	Guido Marcucci	2008	NEJM	Clara D. Bloomfield	Comprehensive Cancer Center, Ohio State University, Columbus, USA	miRNA
Prognostic importance of MN1 transcript levels, and biologic insights from MN1-associated gene and microRNA expression signatures in cytogenetically normal acute myeloid leukemia: a cancer and leukemia group B study	119 untreated primary CN-AML adults younger than 60; mRNA profiling for 75 pateints, miRNA profiling for 73 patients	119	Affymetrix GeneChips for mRNA, custom microarrays for miRNA	Christian Langer	2009	Journal of Clinical Oncology	Clara D. Bloomfield	Ohio State University, Comprehensive Cancer Center, USA	mRNA and miRNA
Peripheral blood T cells in acute myeloid leukemia (AML) patients at diagnosis have abnormal phenotype and genotype and form defective immune synapses withAMLblasts	36 AML patients and from 17 age-matched healthy volunteers; for GEP: CD4 and CD8 T cells from 10 patients with AML and 10 age-matched healthy controls were selected	36	Affymetrix GeneChips	Rifca Le Dieu	2009	Blood	John G. Gribben	Institute of Cancer, Centre for Medical Oncology, Barts and The London School of Medicine, Queen Mary University of London, London	protein coding genes
Genome-wide epigenetic analysis delineates a biologically distinct immature acute leukemia with myeloid/T-lymphoid features	14 of 15 leukemias from the original gene expression cluster 4 described by Valk et al. (2004) - 8 cases with CEBPA mutations and 6 cases with silenced CEBPA; 2 addtional CEBPA-silenced AMLs, 9 T-ALL	25	Affymetrix GeneChips	Maria E. Figueroa	2009	Blood	Ruud Delwel	Department of Medicine, Weill Cornell Medical College, New York, NY & Department of Hematology, Erasmus University Medical Center, Rotterdam, The Netherlands	protein coding genes and genome-wide methylation
High throughput digital quantification of mRNA abundance in primary human acute myeloid leukemia samples	77 AML samples (FAB subtypes M0–M4, including 15 M3), compared to normal promyelocytes, neutrophils and CD34+ cells	77	Affymetrix GeneChips and NanoString nCounter	Jacqueline E. Payton	2009	Journal of Clinical Investigation	Timothy J. Ley	Department of Pathology and Immunology & Department of Medicine, Washington University Medical School, St. Louis, Missouri, USA	protein coding genes
Dysregulated gene expression networks in human acute myelogenous leukemia stem cells	The first dataset: sorted LSC from 7 AML patients and HSC from 3 normal controls. The second dataset: 9 AML patients and 4 normal individuals.	16	Affymetrix GeneChips	Ravindra Majeti	2009	PNAS	Irving L. Weissman	Institute for Stem Cell Biology and Regenerative Medicine and Department of Internal Medicine, Divisions of Hematology and Oncology, Stanford University, Palo Alto, CA, USA	protein coding genes
Age-specific differences in oncogenic pathway dysregulation and anthracycline sensitivity in patients with acute myeloid leukemia.	425 patients with newly diagnosed de novo AML from two publicly available data sets were analyzed after age-specific cohorts (young <or= 45 years, n = 175; elderly >or= 55 years; n = 144)	319	Affymetrix GeneChips	Arati V. Rao	2009	Journal of Clinical Oncology	Bob Löwenberg	Division of Medical Oncology, Department of Medicine, Duke University Medical Center, Durham, NC & Department of Hematology, Erasmus University Medical Center, Rotterdam, the Netherlands	protein coding genes
Prediction of molecular subtypes in acute myeloid leukemia based on gene expression profiling	two independent representative cohorts of de novo AML patients (lower or equal than 60 years), consisting of 247 and 214 patients, the first cohort represents a subset of 285 patients studied by Valk et al. 2004 while the second cohort has not yet been described	461	Affymetrix GeneChips	Roel G.W. Verhaak	2009	Haematologica	Peter J.M. Valk	Department of Hematology, Erasmus University Medical Center, Rotterdam, The Netherlands	protein coding genes
AML at older age: age-related gene expression profiles reveal a paradoxical down-regulation of p16INK4A mRNA with prognostic significance	525 AML patients, divided into 3 cohorts according to age: the youngest (n = 175), the middle (n=175), and the oldest (n = 175)	525	Affymetrix GeneChips	Hendrik J. M. de Jonge	2009	Blood	Gerwin Huls	Division of Pediatric Oncology/Hematology, Department of Pediatrics, Beatrix Children’s Hospital & Epidemiology, University Medical Center Groningen, University of Groningen, Groningen	protein coding genes
ERG Expression Is an Independent Prognostic Factor and Allows Refined Risk Stratification in Cytogenetically Normal Acute Myeloid Leukemia: A Comprehensive Analysis of ERG, MN1, and BAALC Transcript Levels Using Oligonucleotide Microarrays	210 patients with CN-AML	210	Affymetrix GeneChips	Klaus H. Metzeler	2009	Journal of Clinical Oncology	Stefan K. Bohlander	Department of Internal Medicine III, the Institute for Medical Informatics, Biometry, and Epidemiology, University Hospital Großhadern, Ludwig-Maximilians-Universität, Munich, Germany	protein coding genes
Clinical Utility of Microarray-Based Gene Expression Profiling in the Diagnosis and Subclassification of Leukemia: Report From the International Microarray Innovations in Leukemia Study Group	in total 3,334 patients - 2 cohorts (2,143 and 1,190 patients), from 11 laboratories across three continents, including all leukemia types (AML, ALL, CML, CLL) and MDS (693 acute leuekmias)	> 542 (number guven for the first cohort only)	Affymetrix GeneChips	Torsten Haferlach	2010	Journal of Clinical Oncology	Robin Foà	European LeukemiaNet, Gene Expression Profiling Working Group	protein coding genes
A Leukemic Stem Cell Gene Expression Signature is Associated with Clinical Outcomes in Acute Myeloid Leukemia	15 AML LSC-enriched subpopulations (CD34+CD38−) were compared to 15 paired LPC-enriched subpopulations (CD34+CD38+), collected from the same 15 AML samples from two independent studies	15	Affymetrix GeneChips	Andrew J. Gentles	2010	JAMA	Ash A. Alizadeh	Cancer Center, and Institute for Stem Cell Biology and Regenerative Medicine, Stanford University School of Medicine, Palo Alto, CA, USA	protein coding genes
Integrative Meta-Analysis of Differential Gene Expression in Acute Myeloid Leukemia	metanalysis of 25 published datasets	2744	different platforms	Brady G. Miller	2010	PLOS One	John A. Stamatoyannopoulos	Department of Hematology & Department of Genome Sciences, University of Washington, Seattle, Washington, USA	protein coding genes
Mechanisms of resistance against PKC412 in resistant FLT3-ITD positive human acute myeloid leukemia cells	MV4-11 and THP-1 cell lines,plus MV4-11r (resistant cell line)	0	Affymetrix GeneChips	Friedrich Stölzel	2010	Annals of Hematology	Christian Thiede	Medizinische Klinik und Poliklinik IUniversitätsklinikum Carl Gustav Carus Dresden der TU DresdenDresdenGermany	protein coding genes
MicroRNAs expression signatures are associated with lineage and survival in acute leukemias	85 Chinese primary leukemia patients, including 53 acute myeloid leukemia (AML) and 32 acute lymphoblastic leukemia (ALL) cases	53	quantitative PCR analysis of expression of 23 human precursor miRNAs	Yungui Wang	2010	Blood Cells, Molecules, and Diseases	Jie Jin	Department of Hematology, The First Affiliated Hospital Zhejiang University, Hangzhou, Zhejiang, PR China	miRNA
IDH1 and IDH2 gene mutations identify novel molecular subsets within de novo cytogenetically normal acute myeloid leukemia: a Cancer and Leukemia Group B study	358 de novo CN-AML patients	358	gene-expression and miRNA microarrays (Affymetrix)	Guido Marcucci	2010	Journal of Clinical Oncology	Clara D. Bloomfield	Division of Hematology and Oncology, Department of Internal Medicine, Comprehensive Cancer Center, The Ohio State University, Columbus, OH, USA	mRNA and miRNA
RUNX1 mutations in acute myeloid leukemia: results from a comprehensive genetic and clinical analysis from the AML study group	samples from 945 patients (age 18 to 60 years) were analyzed for RUNX1 mutations, for 269 patients, microarray gene expression analysis was performed	945	cDNA microarrays	Verena I. Gaidzik	2011	Journal of Clinical Oncology	Konstanze Döhner	University Hospital of Ulm, Ulm, Germany	protein coding genes
Evaluation of gene expression signatures predictive of cytogenetic and molecular subtypes of pediatric acute myeloid leukemia	samples from 237 children with de novo AML, divided into discovery cohort (n=157) and validation cohort (n=80), plus 33 with relapsed and 8 with secondary AML	237	Affymetrix GeneChips	Brian V. Balgobind	2011	Haematologica	Monique L. den Boer	Erasmus MC-Sophia Children’s Hospital, Department of Pediatric Oncology and Hematology, Rotterdam, Netherlands.	protein coding genes
Characterization of microRNA and mRNA Profiles Delineates Early Differentiation Pathways of CD133+ and CD34+ Hematopoietic Stem and Progenitor Cells	HSCs were isolated from human bone marrow donors	0	miRNA microarray (Miltenyi Biotec )	Ute Bissels	2011	Stem Cells	Andreas Bosio	Miltenyi Biotec GmbH, Bergisch Gladbach, Germany	miRNA
Functional implications of microRNAs in acute myeloid leukemia by integrating microRNA and messenger RNA expression profiling.	adult AML patients	48	2 microarray platforms	Violaine Havelange	2011	Cancer	Ramiro Garzon	Comprehensive Cancer Center, The Ohio State University, Columbus, USA	mRNA and miRNA
Genome-wide identification of human microRNAs located in leukemia-associated genomic alteration	Acute myeloid leukemic cell lines, KG-1, KG-1a, UT-7, HL-60, and THP-1, myelodysplastic cell line MDS-L, and CD34+ cells from cryopreserved BM or PB; miRNA expression set: 54 AML patient and 11 controls	54	aCGH and miRNA microarrays and NGS (Illumina)	Daniel T. Starczynowski	2011	Blood	Aly Karsan	British Columbia Cancer Agency Research Centre & Department of Pathology and Laboratory Medicine, University of British Columbia, Vancouver, BC	DNA and miRNA
RUNX1 Mutations Are Associated With Poor Outcome in Younger and Older Patients With Cytogenetically Normal Acute Myeloid Leukemia and With Distinct Gene and MicroRNA Expression Signatures	in total 400 CN-AML pateints, including 60 (15%) with at least one RUNX1 sequence variation; younger (< 60 years; n = 175) and older (≥ 60 years; n = 225)	400	Affymetrix GeneChips for mRNA, custom microarrays for miRNA	Jason H. Mendler	2012	Journal of Clinical Oncology	Clara D. Bloomfield	Ohio State University, Comprehensive Cancer Center, USA	mRNA and miRNA
Routine use of microarray-based gene expression profiling to identify patients with low cytogenetic risk acute myeloid leukemia: accurate results can be obtained even with suboptimal samples.	182 BM and/or PB samples from 97 AML patients (APL (n = 18), t(8;21)-AML (n = 19), inv(16)-AML (n = 29), NK-AML (n = 31)); Training Set: 18 samples of unique or pooled normal BM and 71 AML samples; Test set: 111 suboptimal AML samples from 53 patients	206	Illumina Expression Bead-Chips	Diane Raingeard de la Blétière	2012	BMC Medical Genomics	Philippe Guardiola	Plateforme SNP, Transcriptome & Epigénomique, Centre Hospitalier Universitaire, Angers, France	protein coding genes
FLT3-ITD-associated gene-expression signatures in NPM1-mutated cytogenetically normal acute myeloid leukemia	microaray data from two publicly available independent GEP cohorts (accession number: GSE6891 (105 patients) and GSE15434 (107 patients)), real-time PCR for 16de novo CN-AML patients: NPM1mut+/FLT3-ITD− (8) and NPM1mut+/FLT3-ITD+ (8)	228	Affymetrix GeneChips and real-time PCR	Liang Huang	2012	International Journal of Hematology	Jianfeng Zhou	Department of Hematology, Tongji Hospital, Tongji Medical CollegeHuazhong University of Science and TechnologyWuhanPeople’s Republic of China	protein coding genes
Integration of SNP and mRNA arrays with microRNA profiling reveals that MiR-370 is upregulated and targets NF1 in acute myeloid leukemia	16 myeloid cell lines, 68 AML patients for NF1 expression analysis	68	microarrays and qRT-PCR	Laura García-Ortí	2012	PLoS ONE	María D. Odero	Division of Oncology, Center for Applied Medical Research (CIMA), University of Navarra, Pamplona, Spain	mRNA, miRNA and SNP
miR-29a and miR-142-3p downregulation and diagnostic implication in human acute myeloid leukemia	microarray analysis: 10 AML cases (M1-M5, 2 patients from each FAB types) plus 6 normal PBMC samples,validation by qPCR (only 2 miRNAs): 52 cases of newly diagnosed AML patients and 100 normal adult donors	10 and 52	miRNA locked nucleic acids (LNA) arrays (miRCURY)	Fang Wang	2012	Molecular Biology Reports	Jun-Wu Zhang	National Laboratory of Medical Molecular Biology, Institute of Basic Medical Sciences, Chinese Academy of Medical Sciences & Peking Union Medical College, Beijing, People’s Republic of China	miRNA
Expression and prognostic impact of lncRNAs in acute myeloid leukemia	148 untreated older CN-AML cases and an independent set of 71 untreated older patients with CN-AML	219	custom microarrays (Human lncRNA array, ArrayStar)	Ramiro Garzon	2014	PNAS	Clara D. Bloomfield	The Ohio State University Comprehensive Cancer Center, Columbus, Ohio, USA	whole transcriptome
High Expression of AHSP, EPB42, GYPC and HEMGN Predicts Favorable Prognosis in FLT3-ITD-Negative Acute Myeloid Leukemia	Four microarray datasets used for gene expression signature determination: E-TABM-1029, GSE15434, GSE61804, and TCGA AML dataset; in total: 831 AML samples, including 226 FLT3-ITD.-positive; for prognosis analysis GSE12417 dataset (242 NK-AML samples having prognosis information)	831	Affymetrix GeneChips	Gang-Zhi Zhu	2017	Cellular Physiology and Biochemistry	Xiao-Ping Chen	Department of Clinical Pharmacology, Xiangya Hospital, Central South University, Changsha, China	protein coding genes
The non-coding RNA landscape of human hematopoiesis and leukemia	12 distinct hematopoietic cell populations from blood of healthy donors, more than 600 adult AML samples, 46 pediatric AMLs, and leukemia cell lines	~650	microarrays (Agilent)	Adrian Schwarzer	2017	Nature Communications	Jan-Henning Klusmann	Institute of Experimental Hematology & Pediatric Hematology and Oncology, Hannover Medical School, Hannover, Germany	whole transcriptome
Molecular synergy underlies the co-occurrence patterns and phenotype of NPM1-mutant acute myeloid leukemia	mouse gene expression profiling, n = 4 to 10 (Lin−) or n = 3 to 5 (multipotent progenitor [MPP])	0	Illumina Expression Bead-Chips (Mouse), CHG arrays (Agilent) and exome seq (Illumina)	Oliver M. Dovey	2017	Blood	George S. Vassiliou	Wellcome Trust Sanger Institute, Wellcome Trust Genome Campus, Cambridge, United Kingdom	mRNA and DNA
AMLprofiler: A Diagnostic and Prognostic Microarray for Acute Myeloid Leukemia	53 adult patients with de novo AML (65 AML samples which included 49 from BM and 16 from PB)	53	diagnostic microarray developed by SkylineDx for use with Affymetrix technology	Marco Alessandrini	2017	Methods in Molecular Biology	Michael S. Pepper	Faculty of Health Sciences, Department of Immunology, and Institute for Cellular and Molecular Medicine, SAMRC Extramural Unit for Stem Cell Research and TherapyUniversity of PretoriaPretoriaSouth Africa	mRNA and DNA
Gene expression profiling of acute myeloid leukemia samples from adult patients with AML-M1 and -M2 through boutique microarrays, real-time PCR and droplet digital PCR.	33 AML patients wit M1 and M2 FAB subtypes plus 15 healthy voluneers	33	custom microarrays	Luiza Handschuh	2018	International Journal of Oncology	Marek Figlerowicz	European Center for Bioinformatics and Genomics, Instutute of Bioorganic Chemistry PAS, Pozna, Poland	protein coding genes
CircPAN3 mediates drug resistance in acute myeloid leukemia through the miR-153-5p/miR-183-5p–XIAP axis	doxorubicin (ADM)-resistant THP-1 AML cell line (THP-1/ADM) and naive THP-1 cells for circRNA identification, then 42 AML patients for validation	42	high-throughput microarray	Jin Shang	2019	Experimental Hematology	Wen-Bing Wu	Provincial Clinical Medical College of Fujian Medical University; Department of Hematology, Fujian Provincial Hospital, Fuzhou, Fujian, China.	whole transcriptome
NGS-BASED PAPERS
Complete characterization of the microRNAome in a patient with acute myeloid leukemia	1 AML miRNome, compared with the genome from the same patient, known earlier (female, AML M1)	1 (case study)	NGS (SOLiD)	Giridharan Ramsingh	2010	Blood	Daniel C. Link	Department of Medicine, Washington University School of Medicine, St Louis, MO, USA	miRNA
RNA-seq analysis of 2 closely related leukemia clones that differ in their self-renewal capacity	2 closely related murine leukemias created through the retroviral overexpression of Meis1 and Hoxa9	2 (mice)	microarrays (Nimblegen) and NGS (SOLiD)	Wilhelm	2011	Blood	Guy Sauvageau	University of Montreal, Institute for Research in Immunology and Cancer, Montreal, Canada	whole transcriptome (total RNA, including mRNA and microRNA)
New fusion transcripts identified in normal karyotype acute myeloid leukemia	45 AML cases: 29 normal karyotype AML (only these submitted to RNA-seq, 8 abnormal karyotype AML and 8 AML without karyotype informaiton	29	NGS (Illumina)	Hongxiu Wen	2012	PLoS One	San Ming Wang	Department of Genetics, Cell Biology and Anatomy, University of Nebraska Medical Center, Omaha, NE, USA	mRNA
Genomic and epigenomic landscapes of adult de novo acute myeloid leukemia	whole-genome sequencing (50 cases , whole-exome sequencing (150 cases), gene expression microarrays (Affymetrix, 197 cases), RNA-seq (179 cases), microRNA sequencing (194 cases), and DNA-methylation (197 cases), SNP arrays (200 cases)	200	NGS (Illumina)	The Cancer Genome Atlas Research Network	2013	NEJM	Timothy J. Ley	Washington University School of Medicine, Division of Oncology, Stem Cell Biology Section, St. Louis, MO, USA	DNA, mRNA and miRNA
Dynamic transcriptomes of human myeloid leukemia cells	3 basic myeloid leukemia cell lines, K562, HL-60, and THP1, representing chronic myeloid leukemia (CML), APL and acute monocytic leukemia, respectively	2 (cell lines)	NGS (SOLiD)	Hai Wang	2013	Genomics	Xiangdong Fang	CAS Key Laboratory of Genome Sciences and Information, Beijing Institute of Genomics, Chinese Academy of Sciences, China	whole transcriptome (rRNA-depleted total RNA)
Global Identification of EVI1 Target Genes in Acute Myeloid Leukemia	2 Evi1 overexpressed murine cell lines: DA-1, NFS-60, both also with shRNA Evi1 knockdown	2	NGS (Illumina)	Carolyn Glass	2013	PLoS One	Archibald Perkins	Department of Pathology and Lab Medicine, University of Rochester Medical Center, Rochester, New York, USA	mRNA and chromatin-binding proteins
CBFA2T3-GLIS2 fusion transcript is a novel common feature in pediatric, cytogenetically normal AML, not restricted to FAB M7 subtype	20 pediatric patients with CBFA2T3-GLIS2 fusion transcript out of 237 investigated	20	NGS (Illumina)	Riccardo Masetti	2013	Blood	Franco Locatelli	Paediatric Oncology and Haematology Unit, Lalla Seragnoli, Sant’Orsola-Malpighi Hospital, Bologna, Italy	mRNA
DHH-RHEBL1 fusion transcript: a novel recurrent feature in the new landscape of pediatric CBFA2T3-GLIS2-positive acute myeloid leukemia	8 pediatric patients (test cohort): 4 NK-Aml, 4 with CBFA2T3-GLIS2 fusion transcript; validation cohort: 55 children with AML	8	NGS (Illumina)	Riccardo Masetti	2013	Oncotarget	Franco Locatelli	Paediatric Oncology and Haematology Unit, Lalla Seragnoli, Sant’Orsola-Malpighi Hospital, Bologna, Italy	mRNA
RNA-Seq profiling reveals aberrant RNA splicing in patient with adult acute myeloid leukemia during treatment	two samples collected from an individual AML M2 patient at diagnosis and remission	1	NGS (Illumina)	X. Y. Li	2014	European Review for Medical and Pharmacological Sciences	Y. Yao	Department of General Surgery, The Center Hospital of Xi'an, Shaanxi, China, and Department of Oncology, The First Affiliated Hospital of Xi'an Jiaotong University, Shaanxi, China	whole transcriptome
RNA-Seq analysis identifies aberrant RNA splicing of TRIP12 in acute myeloid leukemia patients at remission	two samples collected from an individual AML M2 patient at diagnosis and remission, submitted to RNA-seq, the remianing paired samples from 7 AML patients were validated with qRT-PCR	8	NGS (Illumina)	Panke Gao	2014	Tumor Biology	Xiangshan Cao	Department of Hematology, The Third Hospital Affiliated to Suzhou University, First People’s Hospital of Changzhou, Jiangsu, China	whole transcriptome
Whole genome and transcriptome analysis of a novel AML cell line with a normal karyotype	novel AML cell line	0	NGS (Illumina)	Géraldine Gosse	2015	Leukemia Research	Brian T.Wilhelm	Institute for Research in Immunology and Cancer, University of Montreal, Montreal, QC, Canada	mRNA and DNA (whole genome and RNA-seq)
Mutant U2AF1 Expression Alters Hematopoiesis and Pre-mRNA Splicing In Vivo	8 samples with a spliceosome gene mutation, including 6 samples with a U2AF1 mutation affecting the S34 amino acid (4 S34F, 2 S34Y), 1 sample with U2AF1(Q157P), 1 sample with SF3B1(K700E), and 102 samples without a mutation or copy number alteration in spliceosome genes	110	NGS (Illumina)	Cara Lunn Shirai	2015	Cancer Cell	Matthew J. Walter	Department of Medicine, Division of Oncology, Washington University, St. Louis, MO, USA	whole transcriptome
SUMOylation of sPRDM16 promotes the progression of acute myeloid leukemia	THP-1 and NB4 cell lines	2 cell lines	NGS (Illumina)	Song Dong	2015	BMC Cancer	Jieping Chen	Department of Hematology, Southwest Hospital, Third Military Medical University, People’s Republic of China	mRNA
Transcriptome Profiling of Pediatric Core Binding Factor AML	64 pediatric AML patients: 17 with t(8;21), 14 with inv(16), 33 NK-AML	64	NGS (Illumina)	Chih-Hao Hsu	2015	PLoS One	Soheil Meshinchi	Center for Biomedical Informatics and Information Technology, National Cancer Institute, Rockville, MD, USA	mRNA
Identification of the NUP98-PHF23 fusion gene in pediatric cytogenetically normal acute myeloid leukemia by whole-transcriptome sequencing	RNA-seq 13 pediatric CN-AML cases, validated in an independent cohort of 168 AML patients enrolled in the AIEOP AML 2002/01 study	181	NGS (Illumina)	Marco Togni	2015	Journal of Hematology & Oncology	Franco Locatelli	Department of Pediatrics, “Lalla Seràgnoli” Hematology-Oncology Unit, University of Bologna, Bologna, Italy	mRNA
AML associated oncofusion proteins PML-RARA, AML1-ETO and CBFB-MYH11 target RUNX/ETS-factor binding sites to modulate H3ac levels and drive leukemogenesis	expression data from Kasumi-1, ME-1 and NB4 (GSE23730, GSE76464, GSE46044, GSE18886) cells, and cohort studies in AML patients by Verhaak et al., 2009 (GSE6891, 461 patients from 2 cohorts: 247 and 214) and from TCGA 2013 (200 patients, 197 with microarray-gene expression measured, 179 with RNA-seq)	461	microarrays (Affymetrix) and NGS (Illumina)	Abhishek A. Singh	2016	Oncotarget	Joost H.A. Martens	Radboud University, Department of Molecular Biology, Faculty of Science, Nijmegen Centre for Molecular Life Sciences, Nijmegen, The Netherlands	DNA and mRNA
A 17-gene stemness score for rapid determination of risk in acute leukaemia	78 AML patients in a training set, validated by xenotransplantation, and 5 independent validation cohorts of 908 AML patients with different subtypes	78 plus 908	microarrays (Illumina, Affymetrix), NGS (Illumina) and NanoString	Stanley W.K. Ng	2016	Nature	Jean C. Y. Wang	1Institute of Biomaterials and Biomedical Engineering, University of Toronto, Canada, and Princess Margaret Cancer Centre, University Health Network, Toronto, Canada	mRNA
Acfs: accurate circRNA identification and quantification from RNA-Seq data	5 APL and 5 AML samples	10	NGS (Illumina)	Xintian You	2016	Scientific Reports	Tim OF Conrad	Department of Numerical Mathematics, The Zuse Institute Berlin & Institut für Mathematik, Freie Universität Berlin, Berlin, Germany	whole transcriptome
Recurrent chimeric fusion RNAs in non-cancer tissues and cells	nearly 300 RNA-Seq libraries covering 30 different non-neoplastic human tissues and cells as well as 15 mouse tissues	0	NGS (Illumina)	Mihaela Babiceanu	2016	Nucleic Acid Research	Hui Li	Department of Pathology, School of Medicine, University of Virginia, Charlottesville, VA, USA	mRNA
MiRNAs and piRNAs from bone marrow mesenchymal stem cell extracellular vesicles induce cell survival and inhibit cell differentiation of cord blood hematopoietic stem cells: a new insight in transplantation	BM-MSC-EVs (bone marrow mesenchymal stem cell extracellular vesicles) and the UCB-CD34+ cells (umbilical cord blood CD34+ stem cells)	0	gene expression BeadChips (Illumina) for mRNA, NGS (Illumina) for miRNA	Luciana De Luca	2016	Oncotarget	Pellegrino Musto	Laboratory of Preclinical and Translational Research, IRCCS-Centro di Riferimento Oncologico della Basilicata (CROB), Rionero in Vulture, Italy	mRNA and small RNAs
Circular RNAs of the nucleophosmin (NPM1) gene in acute myeloid leukemia	AML patients selected from AMLSG_07-04 study: 46 patients for quantification of particular circRNA, 10 AML patients for RNA-seq	10 and 46	NGS (Illumina and Oxford Nanopore)	Susanne Hirsch	2017	Haematologica	Lars Bullinger	Internal Medicine III, University Hospital Ulm, Germany	whole transcriptome and qRT-PCR for particular circular transcript
Conditional knockin of Dnmt3a R878H initiates acute myeloid leukemia with mTOR pathway involvement	Dnmt3aR878H/WT Mx1Cre+ Mice	0	NGS (Illumina)	Yu-Jun Dai	2017	PNAS	Sai-Juan Chen	State Key Laboratory of Medical Genomics, Shanghai Institute of Hematology, Rui Jin Hospital, Shanghai Jiao Tong University School of Medicine, Shanghai, China	single-cell transcriptome sequencing, and DNA (exome seq. and methylation analysis)
New chimeric RNAs in acute myeloid leukemia	Three sets of AML samples: 25, 14 and 3; NB4, U937, and NB4-LR2 cell lines	42	NGS (Illumina)	Florence Rufflé	2017	F1000 Research	Threse Commes	Institut de Biologie Computationnelle, Université Montpellier & Institut de Médecine Régénératrice et de Biothérapie, INSERM U1183, Montpellier, France	whole transcriptome
lncRNA requirements for mouse acute myeloid leukemia and normal differentiation	murine model and AML cell lines	0	NGS (Illumina)	M Joaquina Delas	2017	eLife	Gregory J Hannon	Cancer Research UK Cambridge Institute, Li Ka Shing Centre, University of Cambridge, Cambridge, United Kingdom & Watson School of Biological Sciences, Howard Hughes Medical Institute, Cold Spring Harbor Laboratory, New York, USA	whole transcriptome
Comprehensive discovery of non-coding RNAs in acute myeloid leukemia cell transcriptomes	1 sample studied, then integration of RNA-seq data from 179 AML cases	180	NGS (Illumina)	Jin Zhang	2017	Experimental Hematology	Christopher A. Maher	The McDonnell Genome Institute, Washington University, St. Louis, USA	whole transcriptome
lncRNA co-expression network model for the prognostic analysis of acute myeloid leukemia	TCGA AML sample set (200 cases)	200	NGS (Illumina)	Jia-Qi Pan	2017	International Journal of Molecular Medicine	Wei Wang	Department of Hematology, The Second Affiliated Hospital of Harbin Medical University, Harbin, P.R. China	whole transcriptome
Mutational Landscape and Gene Expression Patterns in Adult Acute Myeloid Leukemias with Monosomy 7 as a Sole Abnormality.	36 cases of -7 AML, including 31 sequenced	36	NGS (Illumina)	Ann-Kathrin Eisfeld	2017	Cancer Research	Clara D. Bloomfield	Ohio State University, Comprehensive Cancer Center, USA	DNA, mRNA and miRNA
Single-cell genomic profiling of acute myeloid leukemia for clinical use: A pilot study	20 single cells from 1 AML patient	1	NGS (Illumina)	Benedict Yan	2017	Oncology Letters	Roger Foo	Genome Institute of Singapore, Singapore	mRNA
Acute myeloid leukemia with del(9q) is characterized by frequent mutations of NPM1, DNMT3A, WT1 and low expression of TLE4	13 patients with del(9q) and 454 patients with normal karyotype or various cytogenetic aberrations	467	NGS (Illumina)	Tobias Herold	2017	Genes, Chromosomes & Cancer	Philipp A. Greif	Department of Internal Medicine 3,University Hospital Grosshadern, Ludwig-Maximilians-Universitat (LMU) Munchen, Germany	DNA and mRNA
Superenhancer Analysis Defines Novel Epigenomic Subtypes of Non-APL AML, Including an RARα Dependency Targetable by SY-1425, a Potent and Selective RARα Agonist	66 AML donors, 28 AML cell lines, 4 FACS-purified HSPC samples, and 6 FACS-purified monocyte samples	66	NGS (Illumina)	Michael R McKeown	2017	Cancer Discovery	Christian C. Fritz and Ravindra Majeti	Syros Pharmaceuticals, 620 Memorial Drive, Cambridge, MA, and Department of Medicine, Division of Hematology, Stanford University School of Medicine, Stanford, CA	chromatin and transcriptome
Suppression of Transposable Elements in Leukemic Stem Cells	pre-leukemic haematopoietic stem cells (pHSCs; CD34+CD38negCD99negTIM3neg), leukemic stem cell (LSCs; CD34+CD38negCD99+TIM3+), and leukemic blasts (Blasts; CD99+TIM3+CD45midSSChigh), extracted from normal donors and AML patients, data collected by Corces et al. 2016 (DOI:10.1038/ng.3646)	39	NGS (Illumina)	Anthony R. Colombo	2017	Scientific Reports	Giridharan Ramsingh	Keck School of Medicine of University of Southern California, Jane Anne Nohl Division of Hematology and Center for the Study of Blood Diseases, Los Angeles, California, USA	whole transcriptome
Assessing the miRNA sponge potential of RUNX1T1 in t(8;21) acute myeloid leukemia	7 AMLs with t(8;21) from TCGA dataset (published in 2013)	7	NGS (Illumina)	Alexander Junge	2017	Gene	Jack Bernard Cowland	Center for Non-coding RNA in Technology and Health, University of Copenhagen, Denmark	mRNA and miRNA
Functional genomic landscape of acute myeloid leukaemia	exome sequencing on 622 of the specimens from the cohort representing 531 unique patients; RNA sequencing was performed on 451 specimens from 411 patients	562	NGS (Illumina)	Jeffrey W. Tyner	2018	Nature	Brian J. Druker	Knight Cancer Institute & Department of Cell, Developmental & Cancer Biology, Oregon Health & Science University, Portland, OR, USA	DNA and mRNA
Genomic characterization of chromosome translocations in patients with T/myeloid mixed-phenotype acute leukemia	four patients with T/Myeloid MPAL, including two t(6;14)(q25;q32) one t(8;14) (q24.2;q32) and one t(7;8)(p14;q24.2).	4	NGS (Illumina)	Aparna Pallavajjala	2018	Leukemia & Lymphoma	Yi Ning	Department of Pathology, Johns Hopkins University School of Medicine, Baltimore, MD, USA	DNA and mRNA
Rearrangement of VPS13B, a causative gene of Cohen syndrome, in a case of RUNX1-RUNX1T1 leukemia with t(8;12;21)	case report; AML M2 patient with complex 3-way translocation: t(8;12;21)(q22;p11;q22)	1	NGS (Illumina)	Akihiro Abe	2018	International Journal of Hematology	Nobuhiko Emi	Department of Hematology, Fujita Health University, Aichi, Japan	whole transcriptome
Integrative analysis reveals functional and regulatory roles of H3K79me2 in mediating alternative splicing	34 cell types, including 18 normal and 16 cancer cell types, including AML	4	NGS (Illumina)	Tianbao Li	2018	Genome Medicine	Victor X. Jin	Department of Molecular Medicine, University of Texas Health, San Antonio, USA	DNA and mRNA
Expression levels of long non-coding RNAs are prognostic for AML outcome	274 intensively treated AML patients from a Swedish cohort and (for validation) 142 AML patients from TCGA cohort	416	NGS (Illumina)	Arvind Singh Mer	2018	Journal of Hematology and Oncology	Mattias Rantalainen	Department of Medical Epidemiology and Biostatistics, Karolinska Institutet, Stockholm, Sweden	whole transcriptome
Expression profiling of snoRNAs in normal hematopoiesis and AML	different subpopoulations of normal hematopoietoc cells and 33 de novo AML	33	NGS (Illumina)	Wayne A. Warner	2018	Blood Advances	Daniel C. Link	Division of Oncology, School of Medicine & Siteman Cancer Center, Washington University, St. Louis, USA	mRNA and custome transcriptome, with approximate target size 17-200 nt
MYC-containing amplicons in acute myeloid leukemia: genomic structures, evolution, and transcriptional consequences	24 AML-amp cases, 2 remission samples from cases that were AML-amp at diagnosis, 29 NK-AML cases, 10 AML cases with chromosomal abnormalities not involving chromosome 8, 23 AML cell lines with or without 8q24 gain, and 1 normal PB and 1 BM sample as controls	65	NGS (Illumina)	Alberto L’Abbate	2018	Leukemia	Clelia Tiziana Storlazzi	Department of Biology, University of Bari “Aldo Moro”, Bari, Italy	whole transcriptome
IGFBP7 Induces Differentiation and Loss of Survival of Human Acute Myeloid Leukemia Stem Cells without Affecting Normal Hematopoiesis	comparing gene expression between LSCs and HSCs both residing in the same leukemic bone marrow; CD34+CD38− cells with those of leukemic, more differentiated CD34+CD38+ progenitors from 3 AML cases; 6 cell lines; mice: AML cells from 4 patients were transplanted into NSG mice, treated 4 weeks later with rhIGFBP7	3	microarrays (Affymetrix) and NGS (Illumina)	Han J.M.P.Verhagen	2018	Cell Reports	LindaSmit	Department of Hematology, Cancer Center Amsterdam (CCA), Amsterdam UMC, VU Medical Center, Amsterdam, the Netherlands	whole transcriptome
NPM1 mutated AML can relapse with wild-type NPM1: persistent clonal hematopoiesis can drive relapse	104 paired samples of NPM1mut AML patients with relapse, including 14 that relapsed with NPM1wt AML	104	NGS (Illumina)	Alexander Höllein	2018	Blood Advances	Torsten Haferlach	MLL Munich Leukemia Laboratory, Munich, Germany	DNA
Expression and functional relevance of long non-coding RNAs in acute myeloid leukemia	375 younger (<60 years) and 75 older (>60 years) CN_AML patients	450	NGS (Illumina)	Marius Bill	2019	Leukemia	Adrienne M. Dorrance	The Ohio State University Comprehensive Cancer Center, Columbus, Ohio, USA	whole transcriptome
The stem cell-associated gene expression signature allows risk stratification in pediatric acute myeloid leukemia	228 in a training set, 257 in a validation cohort	485	NanoString assay elaborated by Ng et al., 2016, Nature	Nicolas Duployez	2019	Leukemia	Meyling Cheok	Laboratory of Hematology, CHU Lille, Lille, France	mRNA
Comprehensive genetic diagnosis of acute myeloid leukemia by next-generation sequencing	33 AML patients from the repository of the Clinic for Hematology, Oncology and Immunology or the Munich Leukemia Laboratory, and cell lines	33	NGS (Illumina)	Elisabeth K.M. Mack	2019	Haematologica	Cornelia Brendel	Department of Hematology, Oncology and Immunology, Philipps-University Marburg, and University Hospital Gießen and Marburg, Marburg, Germany	DNA and RNA
